# Supplementary material for: Olfaction in the Multisensory Processing of Faces: A Narrative Review of the Influence of Human Body Odors
Source: PubMed Central journal article supplement (PMC8523678; doi:10.3389/fpsyg.2021.750944), 2021-10-05
Supplement: Table_1.pdf [file Table_1.pdf]

**Table 1** Chronological summary of research investigating behavioral effects of body odors influence on invariant face properties

| Study                               | N <sup>1</sup> -Sex <sup>2</sup> | Face property   | Olfactory stimuli                                                                                    | Experimental task and visual stimuli                                             | Behavioral effects of odorants                                                  |
|-------------------------------------|----------------------------------|-----------------|------------------------------------------------------------------------------------------------------|----------------------------------------------------------------------------------|---------------------------------------------------------------------------------|
| Thorne et al. (2002)                | 32 F <sup>2</sup>                | Attractiveness  | M axillary odor vs. no odor                                                                          | Attractiveness ratings of pictures of M faces                                    | ↗ attractiveness ratings                                                        |
| Platek et al. (2004)                | 7 F, 4 M <sup>2</sup>            | Identity        | axillary odors (self, M or F familiar and unfamiliar odors), androstenone, phenylethanol, or no odor | Face recognition of self, familiar, and unfamiliar faces                         | Facilitation of self-face recognition by self-odor; No effect of familiar odors |
| Mutic et al. (2016)                 | 16 F, 15 M                       | Gender          | M and F axillary odors, neutral odor (unused pad)                                                    | Gender ratings of composite faces varying in F/M characteristic ratio            | Sharpening the perception of sex-ambiguous faces                                |
| Oren and Shamay-Tsoory (2017)       | 42 M                             | Attractiveness  | F axillary odors (in ovulation vs. in luteal phase)                                                  | Attractiveness ratings of pictures of F faces                                    | ↘ attractiveness ratings for pair-bonded compared to single men.                |
| van Nieuwenburg et al. (2019) Exp 2 | 32 F                             | Trustworthiness | Hexanal, hexanal masked by eugenol, eugenol                                                          | Trustworthiness ratings of computer-generated M faces varying in trustworthiness | ↗ trustworthiness ratings                                                       |
| Habel et al. (2021)                 | 18 M                             | Attractiveness  | F axillary odors (ovulating or pregnant women), and neutral odor (unused pad)                        | Attractiveness ratings of pictures of F faces                                    | No effect                                                                       |

<sup>1</sup> Outliers removed; <sup>2</sup>M/F, male/female; ↗, increase; ↘, decrease.

**Table 2** Chronological summary of research investigating behavioral effects of androstenes on invariant face properties

| Study (androstene)                 | N <sup>1</sup> -Sex <sup>2</sup>      | Face property    | Olfactory stimuli                                         | Experimental task and visual stimuli                                              | Behavioral effects of odorants                                                                                                                |
|------------------------------------|---------------------------------------|------------------|-----------------------------------------------------------|-----------------------------------------------------------------------------------|-----------------------------------------------------------------------------------------------------------------------------------------------|
| Kirk-Smith et al. (1978)           | 11 F <sup>2</sup> , 11 M <sup>2</sup> | Attractiveness   | Androstenol                                               | Attractiveness ratings of pictures of F and M faces                               | ↗ attractiveness ratings of F faces by M and F participants                                                                                   |
| Black and Biron (1982)             | 35 F, 36 M                            | Attractiveness   | Androstenol, no odor                                      | Attractiveness ratings of real M and F faces                                      | No effect                                                                                                                                     |
| Filsinger et al. (1985)            | 132 F, 122 M                          | Attractiveness   | Androstenol, androstenone, no odor                        | Attractiveness ratings of pictures of F and M faces                               | Androstenol: ↗ attractiveness ratings of M faces by M participants; Androstenone: ↘ attractiveness ratings of M and F faces by F participants |
| Kirk-Smith and Booth (1990)        | 8 F, 8 M                              | Attractiveness   | Androstenone                                              | Attractiveness ratings of pictures of F and M faces                               | ↘ attractiveness ratings                                                                                                                      |
| Kovács et al. (2004)               | 62 M                                  | Gender           | Androstadienone, estratetraenol, and neutral odor (water) | Gender categorization of computer-generated faces with varying F/M ratio          | Androstadienone : facilitated masculinity perception ; Estratetraenol: no effect                                                              |
| Lundström and Olsson (2005)        | 37 F                                  | Attractiveness   | Androstadienone, clove oil                                | Attractiveness ratings of pictures of M faces                                     | No effect                                                                                                                                     |
| Saxton et al. (2008)               | 54 F                                  | Attractiveness   | Androstadienone, clove oil                                | Attractiveness ratings of real M (speed-dating)                                   | ↗ attractiveness ratings of M faces by F participants                                                                                         |
| Hummer and McClintock (2009) Exp 3 | 30 F, 20 M                            | Social cognition | Androstadienone, clove oil                                | 2-back task (recall pictures of M and F faces presented 2 trial ago)              | No effect                                                                                                                                     |
| Frey et al. (2012) Rating task     | 29 F, 31 M                            | Attractiveness   | Androstadienone, eugenol                                  | Attractiveness ratings of cartoon faces with happy or angry facial expressions    | No effect                                                                                                                                     |
| Frey et al. (2012) Joystick task   | 29 F, 31 M                            | Emotion          | Androstadienone, eugenol                                  | Approach-avoidance task with cartoon faces with happy or angry facial expressions | Fastens reaction speed for angry faces compared to happy faces                                                                                |

<sup>1</sup> Outliers removed; <sup>2</sup>M/F, male/female; ↗, increase; ↘, decrease.

**Table 2** (continued)

| Study (androstene)              | N <sup>1</sup> -Sex <sup>2</sup> | Face property    | Olfactory stimuli                          | Experimental task and visual stimuli                                           | Behavioral effects of odorants                                               |
|---------------------------------|----------------------------------|------------------|--------------------------------------------|--------------------------------------------------------------------------------|------------------------------------------------------------------------------|
| Parma et al. (2012) Exp 2       | 103 F <sup>2</sup>               | Attractiveness   | Androstadienone, clove oil                 | Attractiveness ratings of pictures of F faces                                  | ↘ attractiveness ratings in F faces by F in luteal phase                     |
| Ferdenzi et al. (2016)          | 39 F, 40 M <sup>2</sup>          | Gender           | Androstadienone, clove oil                 | Gender ratings of pictures of F and M faces                                    | No effect                                                                    |
| Ferdenzi et al. (2016)          | 39 F, 40 M                       | Attractiveness   | Androstadienone, clove oil                 | Attractiveness ratings of pictures of F and M faces                            | ↗ attractiveness ratings of M faces by F participants                        |
| Hare et al. (2017) Exp 1        | 46 (M & F)                       | Gender           | Androstadienone, estratetraenol, clove oil | gender categorization of computer-generated androgynous faces                  | No effect                                                                    |
| Hare et al. (2017) Exp 2        | 51 F, 43 M                       | Attractiveness   | Androstadienone, estratetraenol, clove oil | Attractiveness ratings of pictures of F and M faces                            | No effect                                                                    |
| Hornung et al. (2017)           | 29 F, 27 M                       | Social cognition | Androstadienone, musk oil                  | Emotional Stroop task (M and F faces with happy, angry or fearful expressions) | ↗ error rates for angry faces in M participants; no effect on reaction times |
| Hornung Kogler et al. (2018)    | 49 F, 27 M                       | Social cognition | Androstadienone, musk oil                  | Emotional Stroop task (M and F faces with happy, angry or fearful expressions) | No effect                                                                    |
| Hornung Noack et al. (2018)     | 46 F, 27 M                       | Social cognition | Androstadienone, or musk oil               | Emotional Stroop task (M and F faces with happy, angry or fearful expressions) | ↘ of error rates; no effect on reaction times                                |
| Banner and Shamay-tsoory (2018) | 64 M                             | Dominance        | Androstadienone, or eugenol                | Dominance ratings of M faces                                                   | ↗ dominance ratings in M with high social anxiety                            |
| Banner et al. (2019)            | 52 M                             | Dominance        | Androstadienone, eugenol                   | Free viewing of pictures of M faces varying in dominance                       | ↗ gaze avoidance for dominance faces in M with high social anxiety           |

<sup>1</sup> Outliers removed; <sup>2</sup>M/F, male/female; ↗, increase; ↘, decrease.

**Table 3** Chronological summary of research investigating behavioral effects of emotional body odors influence on face perception

| Study                              | N <sup>1</sup> -Sex <sup>2</sup>    | Emotion induction        | Olfactory stimuli                                    | Experimental task and visual stimuli                                                            | Behavioral effects of odorants                                                          |
|------------------------------------|-------------------------------------|--------------------------|------------------------------------------------------|-------------------------------------------------------------------------------------------------|-----------------------------------------------------------------------------------------|
| Pause et al. (2004)                | 8 F <sup>2</sup> , 8 M <sup>2</sup> | Academic examination     | M axillary anxiety or exercise odors                 | Emotional priming of neutral faces with neutral happy, fear, sad faces                          | Anxiety odor $\searrow$ the pleasantness of neutral faces primed by happy faces in F    |
| Mujica-Parodi et al. (2009)        | 5 F, 9 M                            | First-time skydiving     | M axillary anxiety or exercise odors                 | 2-AFC task with Neutral-to-angry morphed faces                                                  | Anxiety odor $\nearrow$ accuracy in the assessment of angry and neutral faces           |
| Zhou and Chen (2009)               | 48 F                                | Watching clips           | M axillary fear, happy, or neutral odor (unused pad) | 2-AFC task with fear-to-happy morphed faces                                                     | Fear odor: ambiguous fear/happy morphed faces found more fearful; happy odor: no effect |
| Gelstein et al. (2011)             | 24 M                                | Watching clips           | F tears, saline or irritant solutions                | Sexual attractiveness rating of pictures of F faces                                             | F faces found less sexually attractive                                                  |
| Zernecke et al. (2011)             | 15 M                                | High rope course         | M axillary anxiety or exercise odors                 | Emotional rating of neutral-to-happy morphed faces                                              | Anxiety odor $\searrow$ happiness rating of neutral/happy morphed faces                 |
| de Groot, Smeets, and Semin (2015) | 31 F                                | Trier Social Stress Task | M axillary fear, or neutral odors                    | Emotion categorization of M and F faces depicting fear, disgust, happy, and neutral expressions | Fear odor quicken categorization of all facial expressions                              |
| Wudarczyk et al. (2016)            | 10 F, 14 M                          | Academic examination     | M axillary anxiety or exercise odors                 | Emotional rating of neutral-to-fearful morphed faces                                            | Anxiety odor $\nearrow$ fearful rating of neutral/fearful morphed faces                 |
| Kamiloğlu et al. (2018)            | 24 F                                | Watching clips           | M axillary fear, or neutral odors                    | Emotion categorization of M and F faces depicting fear, disgust, anger, and neutral expressions | Fear odor quicken categorization of fear faces only                                     |
| Gračanin et al. (2017)             | 75 M                                | Watching clips           | F tears or saline solution                           | Sexual attractiveness rating of pictures of F faces                                             | No effect                                                                               |

<sup>1</sup> Outliers removed; <sup>2</sup>M/F, male/female; neutral odor, sweat collected while watching non-emotional clips;  $\nearrow$ , increase;  $\searrow$ , decrease.

**Table 3** (continued)

| Study                  | N <sup>1</sup> -Sex <sup>2</sup> | Emotion induction    | Olfactory stimuli                              | Experimental task and visual stimuli                                                                                | Behavioral effects of odorants                                                            |
|------------------------|----------------------------------|----------------------|------------------------------------------------|---------------------------------------------------------------------------------------------------------------------|-------------------------------------------------------------------------------------------|
| Rocha et al. (2018)    | 46 F <sup>2</sup>                | Academic examination | M <sup>2</sup> axillary fear, or neutral odors | Emotion categorization of videos of neutral-to-happy or neutral-to-angry M and F faces                              | Anxiety odor $\nearrow$ categorization accuracy of angry and happy faces                  |
| de Groot et al. (2018) | 96 F                             | watching clips       | M axillary fear, happy, or neutral odors       | Breaking Continuous Flash Suppression using M and F faces depicting fear, happy, and neutral facial expressions     | Fear odor $\nearrow$ the readiness to detect both happy and fear faces                    |
| Silvia et al. (2020)   | 29 F                             | Watching clips       | M axillary fear, disgust, or neutral odors     | Breaking Continuous Flash Suppression using M and F faces depicting fear, disgust and neutral emotional expressions | Fear odor sped-up access to awareness to fear faces only; Disgust body odor had no effect |
| de Groot et al. (2021) | 31 F                             | Watching clips       | M axillary fear or neutral odors               | 2-AFC task with fear-to-disgust morphed faces                                                                       | Ambiguous fear/disgust morphed faces found more fearful                                   |

<sup>1</sup> Outliers removed; <sup>2</sup>M/F, male/female; neutral odor, sweat collected while watching non-emotional clips;  $\nearrow$ , increase;  $\searrow$ , decrease

**Table 4** Chronological summary of research investigating effects of body odor influence on face perception in infancy

| Study                | Age          | N <sup>1</sup> -Sex <sup>2</sup>      | Method of measure | Olfactory stimuli               | Experimental task and visual stimuli                                 | Effects of odorants                                                               |
|----------------------|--------------|---------------------------------------|-------------------|---------------------------------|----------------------------------------------------------------------|-----------------------------------------------------------------------------------|
| Durand et al. (2013) | 4-month-olds | 26 F <sup>2</sup> , 22 M <sup>2</sup> | Eye-tracking      | Maternal body odor              | Free viewing of F faces and cars shown side-by-side                  | ↗ of looking time toward faces, especially the eyes area                          |
| Durand et al. (2020) | 4-month-olds | 23F, 25M                              | Eye-tracking      | Own- and other-mother body odor | Free viewing of pictures of own- and other-mother shown side-by-side | Both odors: ↘ looking time toward the face of other mother                        |
| Leleu et al. (2020)  | 4-month-olds | 6 F, 12 M                             | FPVS-EEG          | Maternal body odor              | Free viewing of stream of objects and M and F faces                  | ↗ visual categorization of faces                                                  |
| Jessen (2020)        | 7-month-olds | 38 F, 38 M                            | EEG               | Own- and other-mother body odor | Free viewing of pictures of fear and happy F faces                   | Maternal odor: ↘ the neural response for fear faces; Other-mother odor: no effect |
| Rekow et al. (2021)  | 4-month-olds | 9 F, 11 M                             | FPVS-EEG          | Maternal body odor              | Free viewing of stream of objects and face-like objects              | ↗ visual categorization of face-like object as faces                              |

<sup>1</sup> Outliers removed; <sup>2</sup>M/F, male/female; FPVS-EEG, Fast Periodic Visual Stimulation coupled with Electroencephalography; ↗, increase; ↘, decrease.
